# Supplementary material for: Silencing of ATP Synthase β Impairs Egg Development in the Leafhopper Scaphoideus titanus, Vector of the Phytoplasma Associated with Grapevine Flavescence Dorée
Source: MDPI journal article supplement (doi:10.3390/ijms23020765), 2022-01-11
Supplement: s1 [file s1]

# Silencing of ATP synthase $\beta$ impairs egg development in the leafhopper *Scaphoideus titanus*, vector of the phytoplasma associated with grapevine Flavescence dorée

Matteo Ripamonti<sup>1</sup>, Luca Cerone<sup>1,2</sup>, Simona Abbà<sup>1</sup>, Marika Rossi<sup>1</sup>, Sara Ottati<sup>1,2</sup>, Sabrina Palmano<sup>1</sup>, Cristina Marzachi<sup>1</sup> and Luciana Galetto<sup>1,\*</sup>

<sup>1</sup> Istituto per la Protezione Sostenibile Delle Piante, Consiglio Nazionale Delle Ricerche, IPSP-CNR, Strada delle Cacce 73, 10135 Torino, Italy; matteo.ripamonti@list.lu (M.R.); cerone\_luca@libero.it (L.C.); simona.abba@ipsp.cnr.it (S.A.); marika.rossi@ipsp.cnr.it (M.R.); sara.ottati@ipsp.cnr.it (S.O.); sabrina.palmano@ipsp.cnr.it (S.P.); cristina.marzachi@ipsp.cnr.it (C.M.)

<sup>2</sup> Environmental Research and Innovation Department (ERIN), Luxembourg Institute of Science and Technology (LIST), 41 Rue du Brill, 4422 Luxembourg, Luxembourg

<sup>3</sup> Dipartimento di Scienze Agrarie, Forestali ed Alimentari DISAFA, Università degli Studi di Torino, Largo Paolo Braccini 2, Grugliasco, 10095 Torino, Italy

\* Correspondence: luciana.galetto@ipsp.cnr.it

## Supplementary Tables

**Supplementary Table S1. Over time expression of ATP synthase  $\beta$  transcript in *Scaphoideus titanus* following dsRNA injection.** Mean  $\pm$  standard error of the mean (SEM), total number of samples (N), maximum/minimum and median of normalized relative expression of ATP synthase  $\beta$  transcript measured in *Scaphoideus titanus* sampled at 3, 6, 8, 10 and 14 days post injection of dsRNAs targeting green fluorescent protein (GFP) or ATP synthase  $\beta$  (St\_dsATP1).

| Days post injection | Target of dsRNAs     | ATP synthase $\beta$ expression |             |        |
|---------------------|----------------------|---------------------------------|-------------|--------|
|                     |                      | Mean $\pm$ SEM (N)              | Max/Min     | Median |
| 3                   | GFP                  | 1.278 $\pm$ 0.194 (5)           | 1.928/0.796 | 1.250  |
|                     | ATP synthase $\beta$ | 0.280 $\pm$ 0.056 (5)           | 0.477/0.125 | 0.258  |
| 6                   | GFP                  | 1.387 $\pm$ 0.149 (5)           | 1.956/1.113 | 1.235  |
|                     | ATP synthase $\beta$ | 0.280 $\pm$ 0.038 (5)           | 0.289/0.049 | 0.145  |
| 8                   | GFP                  | 1.268 $\pm$ 0.268 (5)           | 2.110/0.656 | 1.028  |
|                     | ATP synthase $\beta$ | 0.220 $\pm$ 0.113 (4)           | 0.557/0.081 | 0.120  |
| 10                  | GFP                  | 1.185 $\pm$ 0.072 (5)           | 1.327/1.034 | 1.093  |
|                     | ATP synthase $\beta$ | 0.060 $\pm$ 0.009 (5)           | 0.083/0.035 | 0.059  |
| 14                  | GFP                  | 0.676 $\pm$ 0.111 (4)           | 0.952/0.408 | 0.672  |
|                     | ATP synthase $\beta$ | 0.101 $\pm$ 0.045 (5)           | 0.272/0.022 | 0.080  |
| 20                  | GFP                  | 1.140 $\pm$ 0.299 (4)           | 1.894/0.573 | 1.047  |
|                     | ATP synthase $\beta$ | 0.025 $\pm$ 0.007 (4)           | 0.045/0.011 | 0.023  |

**Supplementary Table S2. Expression of selected transcripts related with egg development in *Scaphoideus titanus* females following dsRNA injection.** Mean  $\pm$  standard error of the mean (SEM), total number of samples (N), maximum/minimum and median of normalized relative expression of ATP synthase  $\beta$ , vitellogenin, hexamerin and cathepsin L transcripts measured in *Scaphoideus titanus* females (remaining parts of body after dissection of ovaries observed in Figure 3) sampled at 20 days post injection of dsRNAs targeting green fluorescent protein (GFP) or ATP synthase  $\beta$  (St\_dsATP1).

| Target genes         | Target of dsRNAs     | Normalized relative quantities |             |        |
|----------------------|----------------------|--------------------------------|-------------|--------|
|                      |                      | Mean $\pm$ SEM (N)             | Max/Min     | Median |
| ATP synthase $\beta$ | GFP                  | 1.493 $\pm$ 0.239 (5)          | 2.203/0.738 | 1.491  |
|                      | ATP synthase $\beta$ | 0.033 $\pm$ 0.022 (7)          | 0.168/0.005 | 0.013  |
| vitellogenin         | GFP                  | 1.717 $\pm$ 0.482 (5)          | 3.098/0.450 | 1.280  |
|                      | ATP synthase $\beta$ | 0.977 $\pm$ 0.124 (9)          | 1.721/0.459 | 0.991  |
| hexamerin            | GFP                  | 0.441 $\pm$ 0.169 (5)          | 0.956/0.118 | 0.278  |
|                      | ATP synthase $\beta$ | 3.273 $\pm$ 1.302 (4)          | 7.125/1.383 | 2.291  |
| cathepsin L          | GFP                  | 1.608 $\pm$ 0.424 (5)          | 3.131/0.673 | 1.440  |
|                      | ATP synthase $\beta$ | 0.609 $\pm$ 0.096 (4)          | 0.857/0.390 | 0.594  |

**Supplementary Table S3. Over time expression of ATP synthase  $\beta$  transcript in *Euscelidius variegatus* following injection of different constructs of dsRNAs.** Mean  $\pm$  standard error of the mean (SEM), total number of samples (N), maximum/minimum and median of normalized relative expression of ATP synthase  $\beta$  transcript measured in *Euscelidius variegatus* sampled at 7 and 15 days post injection of 80 and 8 ng per insect of dsRNAs targeting green fluorescent protein (GFP) or ATP synthase  $\beta$  of *E. variegatus* (Eva\_dsATP1, Eva\_dsATP2) and of *Scaphioideus titanus* (St\_dsATP1 and St\_dsATP2).

| Dose of dsRNAs<br>(ng/insect) | Days post<br>injection | Target of dsRNAs | ATP synthase $\beta$ expression |             |        |
|-------------------------------|------------------------|------------------|---------------------------------|-------------|--------|
|                               |                        |                  | Mean $\pm$ SEM (N)              | Max/Min     | Median |
| 80                            | 7                      | GFP              | 1.727 $\pm$ 0.256 (6)           | 2.522/1.076 | 1.553  |
|                               |                        | Eva_dsATP1       | 0.017 $\pm$ 0.002 (6)           | 0.024/0.010 | 0.015  |
|                               |                        | Eva_dsATP2       | 0.016 $\pm$ 0.004 (6)           | 0.036/0.009 | 0.013  |
|                               |                        | St_dsATP1        | 0.061 $\pm$ 0.013 (6)           | 0.100/0.014 | 0.063  |
|                               |                        | St_dsATP2        | 0.065 $\pm$ 0.023 (6)           | 0.166/0.020 | 0.044  |
|                               | 15                     | GFP              | 1.159 $\pm$ 0.102 (5)           | 1.557/0.989 | 1.076  |
|                               |                        | Eva_dsATP1       | 0.017 $\pm$ 0.006 (5)           | 0.031/0.003 | 0.012  |
|                               |                        | Eva_dsATP2       | 0.015 $\pm$ 0.001 (5)           | 0.019/0.013 | 0.015  |
|                               |                        | St_dsATP1        | 0.014 $\pm$ 0.004 (5)           | 0.027/0.004 | 0.014  |
|                               |                        | St_dsATP2        | 0.060 $\pm$ 0.037 (5)           | 0.206/0.016 | 0.025  |
| 8                             | 7                      | GFP              | 1.459 $\pm$ 0.113 (6)           | 1.977/1.199 | 1.406  |
|                               |                        | Eva_dsATP1       | 0.037 $\pm$ 0.009 (5)           | 0.065/0.017 | 0.031  |
|                               |                        | Eva_dsATP2       | 0.023 $\pm$ 0.009 (6)           | 0.066/0.008 | 0.019  |
|                               |                        | St_dsATP1        | 0.203 $\pm$ 0.068 (6)           | 0.512/0.054 | 0.175  |
|                               |                        | St_dsATP2        | 0.060 $\pm$ 0.024 (5)           | 0.138/0.016 | 0.029  |
|                               | 15                     | GFP              | 0.871 $\pm$ 0.102 (6)           | 1.326/0.624 | 0.805  |
|                               |                        | Eva_dsATP1       | 0.011 $\pm$ 0.002 (5)           | 0.016/0.005 | 0.011  |
|                               |                        | Eva_dsATP2       | 0.015 $\pm$ 0.002 (7)           | 0.023/0.009 | 0.014  |
|                               |                        | St_dsATP1        | 0.048 $\pm$ 0.010 (6)           | 0.088/0.020 | 0.045  |
|                               |                        | St_dsATP2        | 0.033 $\pm$ 0.008 (6)           | 0.072/0.015 | 0.026  |

**Supplementary Table S4. List of primers used in this work.**

| Application                | Primer name                                   | 5'-3' sequences                                | Organism/<br>target gene                              | Prod.<br>size | qPCR<br>efficiency | R <sup>2</sup> | Melt<br>peak |
|----------------------------|-----------------------------------------------|------------------------------------------------|-------------------------------------------------------|---------------|--------------------|----------------|--------------|
| dsRNA<br>synthesis         | St_T7ATPsynBeta <sup>f</sup>                  | <u>TAATACGACTCACTATAG</u> TGGCGCTGGTATACGGACAG | <i>S. titanus</i> /<br>ATP<br>synthase $\beta$        | 480<br>nt     | /                  | /              | /            |
|                            | St_T7ATPsynBeta <sup>r</sup>                  | TAATACGACTCACTATAGGGACGCCTCGAGCAATGTTG         |                                                       |               |                    |                |              |
|                            | St_T7ATPsynBeta <sup>f</sup> _2 <sup>#</sup>  | <u>TAATACGACTCACTATAG</u> CAACGCTGTAACAAGGTCGG | <i>E. variegatus</i> /<br>ATP<br>synthase $\beta$     | 195<br>nt     | /                  | /              | /            |
|                            | St_T7ATPsynBeta <sup>r</sup> _2 <sup>#</sup>  | TAATACGACTCACTATAGTCCACTACGGCACCAATCAC         |                                                       |               |                    |                |              |
|                            | Eva_T7ATPsynBeta <sup>f</sup> <sup>1</sup>    | <u>TAATACGACTCACTATAG</u> TACGGCCAGATGAACGAGCC | <i>E. variegatus</i> /<br>ATP<br>synthase $\beta$     | 469<br>nt     | /                  | /              | /            |
|                            | Eva_T7ATPsynBeta <sup>r</sup> <sup>1</sup>    | TAATACGACTCACTATAGGGACACCACGAGCAATGTTG         |                                                       |               |                    |                |              |
|                            | Eva_T7ATPsynBeta <sup>f</sup> _2 <sup>#</sup> | <u>TAATACGACTCACTATAG</u> CAACGCTGTAACAAGGTCTG | <i>S. titanus</i> /<br>hexamerin                      | 195<br>nt     | /                  | /              | /            |
|                            | Eva_T7ATPsynBeta <sup>r</sup> _2 <sup>#</sup> | TAATACGACTCACTATAGTCTACGACGGCACCGATCAC         |                                                       |               |                    |                |              |
|                            | T7GFP <sup>f</sup> <sup>1</sup>               | <u>TAATACGACTCACTATAG</u> CTTTTCACTGGAGTTGTCCC | GFP                                                   | 403<br>nt     | /                  | /              | /            |
|                            | T7GFP <sup>r</sup> <sup>1</sup>               | TAATACGACTCACTATAGGTTTGTGTCCGAGAATGTTTC        |                                                       |               |                    |                |              |
| qPCR<br>target genes       | St_ATP $\beta$ Fw622 <sup>2</sup>             | CGTTTCACTCAGGCTGGTTC                           | <i>S. titanus</i> /<br>ATP<br>synthase $\beta$        | 171<br>nt     | 85.4%              | 0.999          | 82.5°C       |
|                            | St_ATP $\beta$ Rv792 <sup>2</sup>             | ATCATCAGCCGGCACATAGA                           |                                                       |               |                    |                |              |
|                            | St_Vitel_F <sup>2</sup>                       | AAGAGGAACATGCGCTCCTA                           | <i>S. titanus</i> /<br>vitellogenin                   | 98 nt         | 96.2%              | 0.998          | 78.0°C       |
|                            | St_Vitel_R <sup>2</sup>                       | TTGCTGGGCAGGAACTATC                            |                                                       |               |                    |                |              |
|                            | St_HEX_F710 <sup>2</sup>                      | ACGCCAACCAGTACCAGAAC                           | <i>S. titanus</i> /<br>hexamerin                      | 115<br>nt     | 99.4%              | 0.996          | 78.5°C       |
|                            | St_HEX_R824 <sup>2</sup>                      | GCAGGGTCTTCATCTGCTC                            |                                                       |               |                    |                |              |
|                            | St_CathL473_F <sup>2</sup>                    | CATCAAGGACCAGGGCCACTG                          | <i>S. titanus</i> /<br>cathepsin L                    | 92 nt         | 95.7%              | 0.998          | 82.0°C       |
|                            | St_CathL473_R <sup>2</sup>                    | CCAGCTTTCCTGACTTGCGG                           |                                                       |               |                    |                |              |
|                            | ATP $\beta$ Fw622 <sup>2</sup>                | CGCTTTACTCAGGCTGGTTC                           | <i>E. variegatus</i> /<br>ATP<br>synthase $\beta$     | 171<br>nt     | 100%               | 0.995          | 84.5°C       |
|                            | ATP $\beta$ Rv792 <sup>2</sup>                | GTCATCAGCTGGCACGTAGA                           |                                                       |               |                    |                |              |
| qPCR<br>reference<br>genes | St_EF1- $\alpha$ _F215 <sup>3</sup>           | CCATTGACATTGCCCTGTGG                           | <i>S. titanus</i> /<br>elong.<br>factor-1 $\alpha$    | 110<br>nt     | 98.0%              | 0.999          | 77.5°C       |
|                            | St_EF1- $\alpha$ _R325 <sup>3</sup>           | CCTGAGAAGTTCCAGTAATCATG                        |                                                       |               |                    |                |              |
|                            | St_GST1_F257 <sup>3</sup>                     | CTAAGGATGCCCAGAAACGA                           | <i>S. titanus</i> /<br>glut.<br>transfer.             | 113<br>nt     | 94.5%              | 0.998          | 79.0°C       |
|                            | GST1_R369 <sup>3</sup>                        | TGGCGCTCCTCCAAACATCA                           |                                                       |               |                    |                |              |
|                            | EF1- $\alpha$ _F215 <sup>3</sup>              | CCATCGACATTGCCCTGTGG                           | <i>E. variegatus</i> /<br>elong.<br>factor-1 $\alpha$ | 111<br>nt     | 87.9%              | 0.997          | 78.5°C       |
|                            | EF1- $\alpha$ _R325 <sup>3</sup>              | CCTGTGAGGTTCCAGTGATCATG                        |                                                       |               |                    |                |              |
|                            | GST1_F257 <sup>3</sup>                        | CCAAGGACCCCAAGAAGCGA                           | <i>E. variegatus</i> /<br>glut.<br>transfer.          | 113<br>nt     | 87.3%              | 0.997          | 79.0°C       |
|                            | GST1_R369 <sup>3</sup>                        | TGGCGCTCCTCCAAACATCA                           |                                                       |               |                    |                |              |

T7 promoter sequence is underlined.

<sup>#</sup>Primers designed in this work.

<sup>1</sup> Abbà et al., 2019

<sup>2</sup> Galetto et al., 2013

<sup>3</sup> Galetto et al., 2018

## Supplementary Figures

Supplementary Figure S1

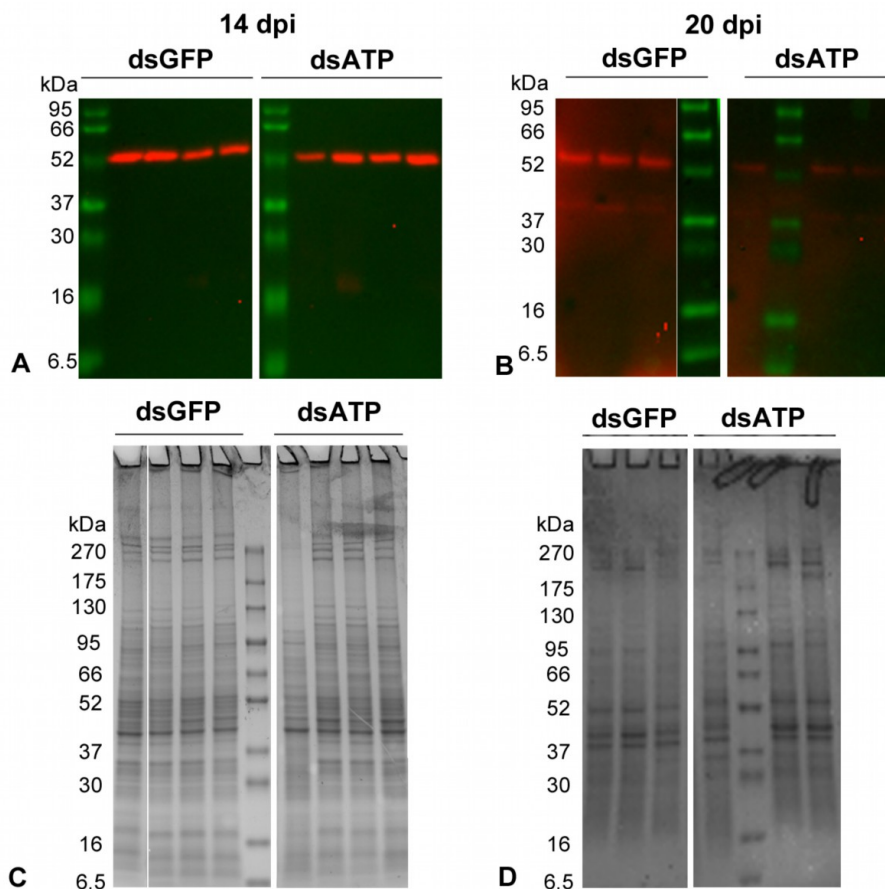

**Supplementary Figure S1. Full length images of Western blots depicted in Figure 2 and corresponding SDS-PAGE.** Full length images of Western blots (WB) (upper panels, A and B) depicted in Figure 2, developed with anti-ATP synthase  $\beta$  antibody, and corresponding Coomassie stained SDS-polyacrylamide gels (lower panels, C and D), run in parallel with WB on the same *Scaphoides titanus* insect samples (one insect sample per single lane), analyzed at 14 (panels A and C) and 20 (panels B and D) days post injection (dpi) of dsRNAs targeting green fluorescent protein (dsGFP) or ATP synthase  $\beta$  (dsATP), with construct St\_dsATP1. The masses of protein standards migrated together with samples are indicated in kDa.

Supplementary Figure S2

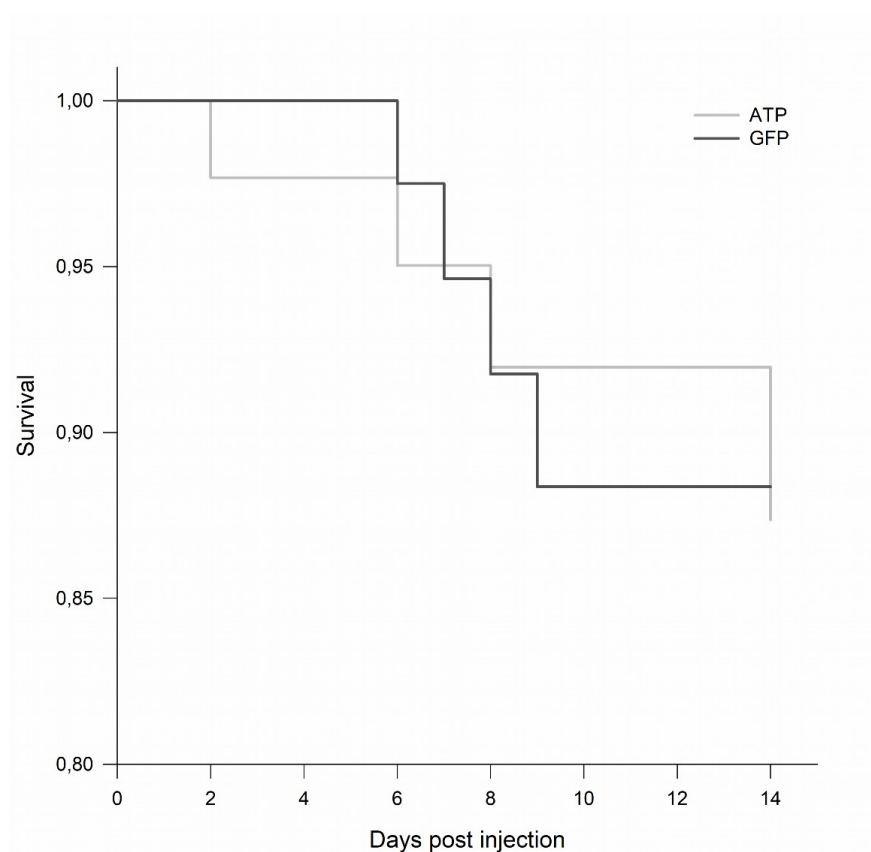

**Supplementary Figure S2. Survival rates of *Scaphoideus titanus* following dsRNA injection.** Survival rates of 61 *Scaphoideus titanus* adults over a 14-day period after microinjection of 80 ng of dsRNAs targeting green fluorescent 62 protein (GFP) or ATP synthase  $\beta$  (ATP), with construct St\_dsATP1.

**Supplementary Figure S3**

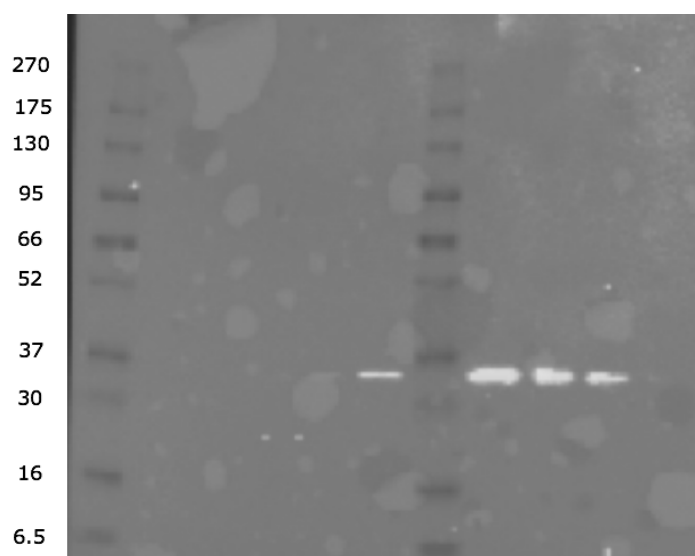

**Supplementary Figure S3. Full lenght image of Western blots depicted in Figure 3.** Full lenght image of Western blots depicted in Figure 3, developed with anti-cathepsin L primary antibody, on ovaries dissected from *Scaphoides titanus* females (ovaries from one insect per single lane) sampled at 20 days post injection of dsRNAs targeting green fluorescent protein (dsGFP) or ATP synthase  $\beta$  (dsATP), with construct St\_dsATP1. The masses of protein standards migrated together with samples are indicated in kDa.
